1 **Structure of the bacterial flagellar rotor MS-ring: a minimum inventory//maximum diversity system**

2

3

4 **Steven Johnson<sup>1,+</sup>, Yu Hang Fong<sup>1,+</sup>, Justin Deme<sup>1,2</sup>, Emily Furlong<sup>1</sup>, Lucas Kuhlen<sup>1</sup> & Susan M. Lea<sup>1,2,\*</sup>**

5

6 1. Sir William Dunn School of Pathology, University of Oxford, South Parks Road, Oxford OX1  
7 3RE, UK

8 2. Central Oxford Structural Molecular Imaging Centre, University of Oxford, South Parks Road,  
9 Oxford, OX1 3RE, UK

10 +Equal contribution

11 \*For Correspondence: [susan.lea@path.ox.ac.uk](mailto:susan.lea@path.ox.ac.uk)

12

13

14 **Abstract**

15 The bacterial flagellum is a complex, self-assembling, nanomachine that confers motility on the cell.  
16 Despite great variation across species, all flagella are ultimately constructed from a helical propellor  
17 attached to a motor embedded in the inner membrane. The motor consists of a series of stator units  
18 surrounding a central rotor made up of two ring complexes, the MS-ring and the C-ring. Despite many  
19 studies, high resolution structural information is still completely lacking for the MS-ring of the rotor,  
20 and proposed mismatches in stoichiometry between the two rings have long provided a source of  
21 confusion for the field. We here present structures of the *Salmonella* MS-ring, revealing an  
22 unprecedented level of inter- and intra-chain symmetry variation that provides a structural  
23 explanation for the ability of the MS-ring to function as a complex and elegant interface between the  
24 two main functions of the flagellum, protein secretion and rotation.

25

26

27 The flagellum is the organelle responsible for the swimming motility of a huge variety of bacterial  
28 species, many of which are of clinical relevance, and the driving force behind this swimming ability has  
29 fascinated researchers since it was first observed in the 17<sup>th</sup> century <sup>1</sup>. Flagella are highly complex,  
30 being formed from more than 25 different proteins assembled into a series of circularly symmetric  
31 and helical assemblies <sup>2-4</sup>. Electron cryotomographic (cryo-ET) studies have demonstrated that  
32 flagellar structures are hugely variable across species, depending on whether the flagella are to be  
33 located freely in the extracellular environment, encased in an outer membrane sheath, or entirely  
34 within the periplasm <sup>5</sup>. At the core of every flagellum, however, is a highly conserved inner-membrane

1 motor that is attached to a drive-shaft, which ultimately culminates in the flagellum (Fig. 1a). The  
2 motor itself consists of a rotor complex surrounded by stator proteins that are proposed to generate  
3 torque. Rotation is rapid (up to 1,700 Hz in some species <sup>6</sup>), utilises ion flow through the membrane  
4 (usually a proton-motive or sodium-motive force <sup>7</sup>), and can respond dynamically to chemotactic  
5 signals <sup>8</sup>. The stators transmit the torque to a cytoplasmic complex known as the C-ring that consists  
6 of three proteins (FliG, FliM, FliN <sup>9,10</sup>). The N-terminal domain of FliG interacts with the extreme C-  
7 terminus of FliF <sup>11,12</sup>, which in turn forms the MS-ring, a large predominantly periplasmic structure that  
8 is tethered to the inner membrane via N- and C-terminal transmembrane helices <sup>13,14</sup>. In addition to  
9 interfacing to the C-ring to form the rotor, the MS-ring is one of the first flagellar structures to  
10 assemble <sup>15</sup>, and houses the type III secretion system (T3SS) of the flagellum that is responsible for the  
11 secretion and assembly of the helical components forming the drive-shaft and propellor <sup>16</sup>. The MS-  
12 ring therefore sits at the heart of the flagellum, both structurally and functionally. Despite this, little  
13 is known about its structure. *Salmonella enterica* serovar Typhimurium (*S. Typhimurium*) FliF consists  
14 of 560 amino acids with predicted transmembrane helices close to the N- and C-termini (Fig. 1b).  
15 Sequence analysis of residues 50-460, which lie in the periplasm, predicted that FliF consists of a series  
16 of ring building motifs (RBMs) that have previously been observed in periplasmic ring forming proteins  
17 of related secretion systems <sup>17</sup>. Most notably, the prediction for RBM3 was that it is formed from two  
18 disparate stretches of sequence, with a long insertion between two of the predicted  $\beta$ -strands. Early  
19 estimates of FliF stoichiometry from purified *S. Typhimurium* flagella suggested approximately 27  
20 copies per flagellum <sup>18</sup>, and low resolution electron cryomicroscopy (cryo-EM) studies produced  
21 reconstructions with 24-, 25- and 26-fold rotational symmetries applied <sup>19,20</sup>. Similar analyses of the *S.*  
22 *Typhimurium* C-ring also showed variable stoichiometry, but centred on a 34-fold symmetry <sup>20-22</sup>.  
23 Models of flagellar rotation have so far needed to account for these proposed mismatches in  
24 symmetry, with disagreements over the exact location of the mismatch and the functional  
25 implications (summarised in <sup>23</sup>. We here present near-atomic resolution structures of the MS-ring  
26 from *S. Typhimurium* that resolve these issues, revealing a conservation of stoichiometry between  
27 MS- and C-rings and unusual internal symmetry mismatches that account for the multiple functions  
28 of the rotor.

29

### 30 **FliF forms rings of mixed internal symmetry**

31 In order to better understand how a single protein could perform multiple different roles, we over-  
32 expressed and purified the *S. Typhimurium* MS ring (FliF), using modifications of previously published  
33 protocols <sup>13</sup>, and collected single-particle cryoEM data from Triton X-100, DDM and amphipol A8-35  
34 solubilised protein (Extended Data Fig. 1). Analysis of near top-down views after 2D classification (Fig.

1 1d) revealed a periodicity at the extremity of the largest ring consistent with > 30 subunits, rather than  
2 the expected 25-27. *Ab-initio* reconstructions and 3D-classifications were performed using a variety  
3 of imposed symmetries, but initially only a C33 reconstruction produced an interpretable map.  
4 Further refinement of this model led to a 2.6 Å volume (Fig 1c, e, f; Extended Data Table 1) in which  
5 33 copies of residues 231-438 of FliF, corresponding to the RBM3/ $\beta$ -collar, were built *de novo* (Fig.  
6 1e). However, all other densities within the C33 volume could not be interpreted as protein, suggesting  
7 either high levels of disorder or different symmetries (Extended Data Fig. 2). We therefore used the  
8 C33 particle set to perform a reconstruction in C1 which, at low resolution, revealed a periodicity  
9 underneath the C33 ring consistent with C21 symmetry. Masked refinement of this region with C21  
10 symmetry imposed led to a 2.9 Å reconstruction (Fig. 1c, e, f; Extended Data Table 1) in which residues  
11 125-222, corresponding to RBM2, could be built. Further refinement of these particles imposing the  
12 common C3 symmetry of the two main rings revealed density consistent with a further nine copies of  
13 RBM2 decorating the outside of the 21-fold symmetric RBM2<sub>inner</sub> ring (Fig. 1g). Underneath each copy  
14 of RBM2<sub>outer</sub> is a smaller density with secondary structures features consistent with a homology model  
15 for RBM1 (Fig. 1g). The overall visible structure therefore contains twenty one copies of FliF  
16 contributing one RBM3 to the 33-fold ring and one RBM2<sub>inner</sub> to the 21-fold ring, nine copies of FliF  
17 contributing one RBM3 to the 33-fold ring and one RBM2<sub>outer</sub>, and three copies of FliF only contributing  
18 one RBM3 to the 33-fold ring (Fig. 1h). In addition we observe density consistent with nine copies of  
19 RBM1 and, although we assume they pair with the nine copies of RBM2<sub>outer</sub>, we cannot see linking  
20 residues to confirm this connectivity. We see no clear protein density that accounts for the remaining  
21 three RBM2s, the remaining twenty four RBM1s, or any of the transmembrane helices and cytoplasmic  
22 portions, but we found no clear evidence of proteolytic fragments in gels (Extended Data Fig. 1) or by  
23 proteomic analyses (data not shown). We did however observe further diffuse densities including a  
24 ring of material close to the observed C-terminal residues, which is consistent with detergent micelle,  
25 and a column of weak density in the centre of the structure underneath the RBM2<sub>inner</sub> ring (Extended  
26 Data Fig. 3).

27

28

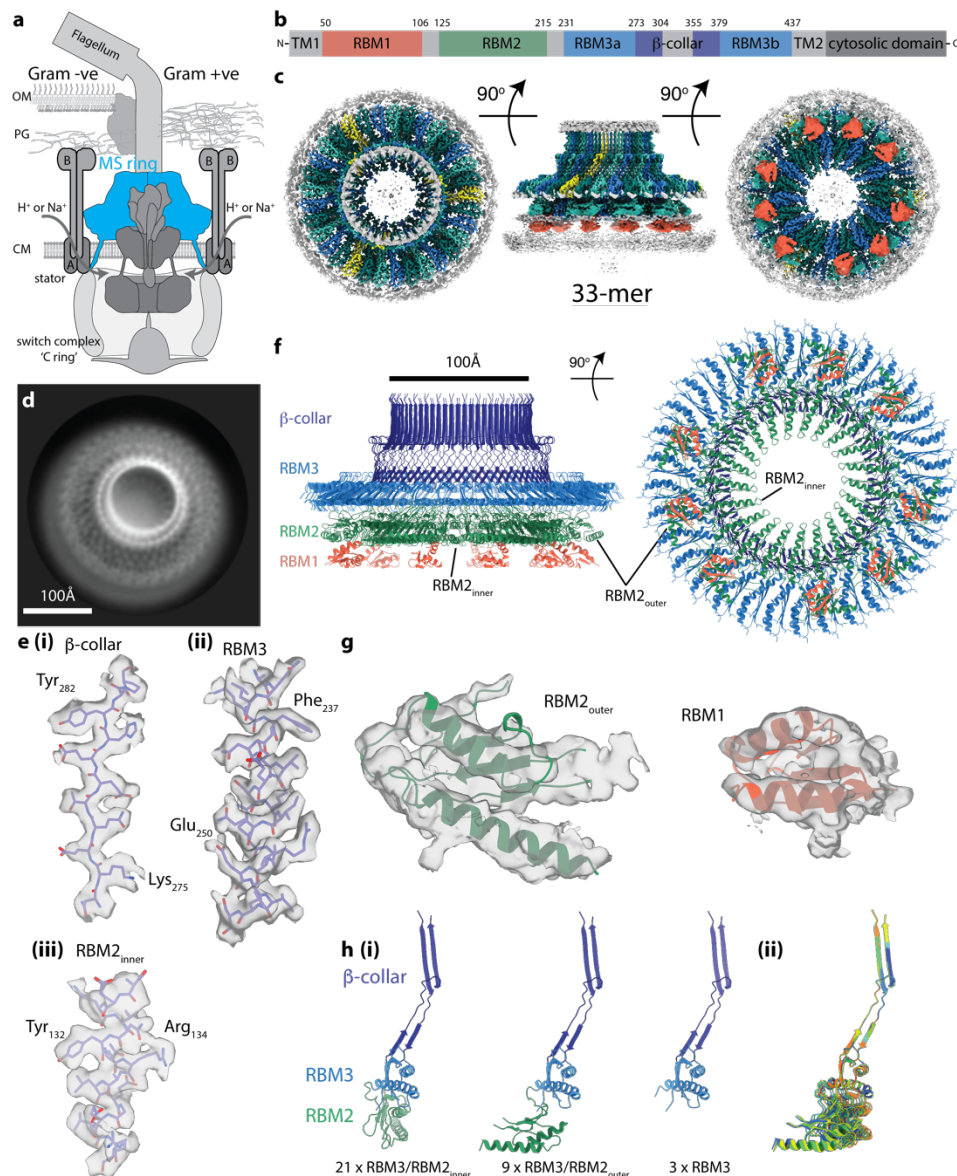

1

## 2 Figure 1: Overall structure of the flagellar MS ring

3 **a**, Schematic showing the location of the MS ring (blue) within the bacterial flagellum. **b**, Cartoon  
4 representation of the domain structure of FliF. **c**, Composite 3D cryo-EM reconstruction with different  
5 symmetries applied within masks (see methods). Regions occupied by RBM2 and RBM3 for each chain  
6 are similarly coloured in an alternating scheme, with the exception of chains for which only RBM3 can  
7 be seen (yellow). Regions assigned to 9 RBM1 domains are indicated in red as connectivity cannot be  
8 definitively assigned. **d**, Representative 2D class of cross-linked FliF complexes on graphene oxide  
9 surface. Scale bar, 100Å. **e**, Representative density for regions where *de-novo* building of protein  
10 domains was possible in (i, ii) the C33 averaged RBM3-region map and (iii) the C21 averaged RBM2<sub>inner</sub>-  
11 region map. **f**, Final model for the 33mer FliF, coloured as in (b). **g**, Representative density for docking  
12 of the RBM2<sub>outer</sub> and RBM1 domains. **h**, (i) Summary of the three main conformations observed for  
13 RBM3/β-collar/RBM2 domains within the complex, coloured as in (e); (ii) overlay of the 11 copies of  
14 FliF that make up one third of the complex reveal the small changes in relative orientations of the  
15 RBM2 and RBM3 domains between different copies required to build the full object.

16

17

1

## 2 **FliF monomer structures**

3 The enormous complexity of the 33-fold MS-ring means that there are a variety of monomer  
4 structures, with each of the 11 chains in the nominal asymmetric unit being unique in terms of relative  
5 domain orientation (Fig. 1h). Each chain, however, is made up of equivalent domains that match the  
6 predicted structural arrangement well (Fig. 1b). The density that corresponds to RBM1 fits a homology  
7 model based on domain 1 of the type III secretion system (T3SS) injectisome protein SctJ, with a  $\beta\alpha\beta\alpha$   
8 topology. RBM2 and RBM3 are both canonical RBM domains with an  $\alpha\beta\beta\alpha\beta$  topology. Despite  
9 sequence identity of only 22%, they are structural homologues (rmsd of 2.3 Å over 78 C $\alpha$ ) (Extended  
10 Data Fig. 4). RBM2 is most closely related to domains from SctD (rmsd of 2.2 Å over 85 C $\alpha$ ) and SctJ  
11 (rmsd of 1.1 Å over 79 C $\alpha$ ), the injectisome basal body proteins that form 24-fold symmetric concentric  
12 rings tethered to the inner membrane<sup>24</sup> (Extended Data Fig. 5). RBM3 on the other hand is a closer  
13 structural homologue of the RBM domain from SpoIIIAG (rmsd of 2.3 Å over 80 C $\alpha$ ), a sporulation  
14 protein from *Bacillus subtilis* that forms 30-fold symmetric rings in the periplasm<sup>25</sup> (Extended Data  
15 Fig. 6). Both the SpoIIIAG RBM domain and RBM3 of FliF contain a long  $\beta$ -strand rich insertion between  
16 the first two  $\beta$ -strands of the RBM fold. The  $\beta$ -insertion (residues 273-379) essentially forms a pair of  
17 2-stranded, anti-parallel  $\beta$ -sheets, one angled  $\sim 60^\circ$  from the horizontal followed by an unusual vertical  
18 section. Residues 305-354 at the tip of the vertical strands are not observed, consistent with  
19 predictions of disorder in this region due to a high number of Pro, Ser and Thr residues. A prominent  
20 loop (residues 284-292) between the sections means that the strands cross over and their relative  
21 positioning is swapped between the angled and vertical sheets (Extended Data Fig. 7). The C-terminus  
22 of RBM3 is the last observed residue in the structure and is directed towards the detergent micelle.

23

24 Overlay of all of the monomers in the structure based on the RBM3/ $\beta$ -collar domains highlights the  
25 structural complexity of the rotor (Fig. 1h). The RBM<sub>inner</sub> and RBM<sub>outer</sub> positions are related by a 120°  
26 rotation and significant changes in the linker between RBM2 and RBM3 are required. However, even  
27 the positions of each RBM<sub>inner</sub> domain display relative rotations of up to 9° in order to accommodate  
28 the symmetry mismatch between the 33-fold and 21-fold symmetric rings.

29

## 30 **Assembly descriptions**

31 The total surface area buried in the FliF ring is enormous (217000 Å<sup>2</sup>), totalling 36 % of the available  
32 monomer surface. All of the interaction surfaces observed in the assembly are highly conserved, with  
33 areas of greatest variation occurring in surface loops and disordered regions (Extended Data Fig. 8).

1 Analysis of the electrostatic surface potential of the monomers reveals that the interaction surfaces  
2 are mostly hydrophobic, but patches of complementary charge are observed (Extended Data Fig. 9).

3

4 The complex can be broken down into four main structural assemblies: the 33-fold symmetric  $\beta$ -collar,  
5 the 33-fold symmetric RBM3 ring, the 21-fold symmetric RBM2<sub>inner</sub> ring and the decorating  
6 RBM2<sub>outer</sub>/RBM1 domains. The  $\beta$ -collar accounts for 77000 Å<sup>2</sup> of the buried area and consists of 66  
7 vertical  $\beta$ -strands (shear number of 0) linked to 66  $\beta$ -strands angled ~60° from the horizontal. In  
8 addition to the standard  $\beta$ -sheet hydrogen bond network, this sub-structure is stabilised by numerous  
9 sidechain mediated hydrogen bonds and two potential salt bridges (His281-Asp369 and Glu280-  
10 Arg370). In addition, we observed a density connecting Arg373 and Lys275 from neighbouring  
11 subunits, consistent with a glutaraldehyde cross-link formed during the final purification stage before  
12 imaging (Extended Data Fig. 10).

13

14 Both of the RBM3 and RBM2<sub>inner</sub> rings are constructed from the type of interface observed in other  
15 secretion system ring-forming motif structures, with the helices of one domain packing against the  $\beta$ -  
16 sheet of the neighbouring domain. However, when comparing the two interfaces, there is an ~6.5°  
17 rotation of one domain relative to the other in order to accommodate the different stoichiometries  
18 of the rings (Extended Data Fig. 11). The RBM3 and RBM2<sub>inner</sub> rings are further stabilised by Glu242-  
19 Arg248 and Arg154-Glu139 inter-subunit salt bridges respectively (Fig. 3c). With the exception of the  
20 linkers between them, there is virtually no contact between the RBM3 and RBM2<sub>inner</sub> rings (Extended  
21 Data Fig. 12). This is likely a reflection of the fact that the symmetry mismatch between the rings both  
22 prevents a consistent interaction surface and leads to a significantly smaller diameter for the RBM2<sub>inner</sub>  
23 ring (70 Å) compared with the RBM3 ring (140 Å) or the  $\beta$ -collar (100 Å). Contacts between the two  
24 mis-matched rings are instead via the RBM2<sub>outer</sub> subunits. The C-terminal loop of one RBM2<sub>outer</sub> subunit  
25 tucks between two RBM3 subunits in the ring above, while the second  $\alpha$ -helix of the  $\alpha\beta\beta\alpha\beta$  motif  
26 bridges two RBM2<sub>inner</sub> subunits rings (Extended Data Fig. 12). Additional contacts are observed  
27 between the C-terminus of an RBM1 domain and two of the RBM2<sub>inner</sub> subunits. However, the lower  
28 resolution of these portions of the structure suggests these are not tight contacts.

29

30 The mechanism by which such a complex arrangement of subunits and mixed symmetries could be  
31 built from a single protein chain is intriguing. It appears that the interaction surfaces of the RBM3 and  
32 RBM2 domains are primed to build rings of significantly different stoichiometry, and hence there is a  
33 need to build in flexibility and the extreme symmetry breaking innovation of the RBM2<sub>outer</sub>  
34 conformations. The majority of the structure is built from units containing two copies of the RBM2<sub>inner</sub>



1 conformation and one copy of the RBM2<sub>outer</sub> conformation, presumably driven by limitations of the  
2 conformations the linkers can take preventing more than two consecutive RBM2<sub>inner</sub> conformations.  
3 These blocks could either be visualised as an RBM2<sub>inner</sub>/RBM2<sub>outer</sub>/RBM2<sub>inner</sub> arrangement, in which the  
4 RBM2<sub>outer</sub> subunit bridges the two RBM2<sub>inner</sub>, or as an RBM2<sub>inner</sub>/RBM2<sub>inner</sub>/RBM2<sub>outer</sub> arrangement, in  
5 which case the RBM2<sub>outer</sub> provides the bridge to the next unit. This pattern is observed for three such  
6 units (contributing 9 RBM3s to the 33-fold ring and 6 RBM2<sub>inner</sub>s to the 21-fold ring), at which point  
7 the pattern is broken by a subunit pair containing one copy of an RBM2<sub>inner</sub> conformation and one  
8 copy for which there is no visible RBM2 density. This completes one third of the structure and this  
9 pattern of packing is then repeated twice more.

10

### 11 **FliF combines elements of sporulation and secretion system structures**

12 The closest structural homologue of the 33-fold RBM3 domain assembly is the SpoIIIAG protein from  
13 the sporulation system of *B. subtilis*<sup>25</sup>, which forms a 30-fold symmetric structure utilising a very  
14 similar interaction surface to the RBM3 domains of FliF (Fig. 2a and Extended Data Fig. 13). Strikingly,  
15 SpoIIIAG also contains a  $\beta$ -insertion that forms a 60-strand  $\beta$ -collar with a shear number of 0, and both  
16 proteins also share a feature of a short triangular insertion at the point the strands change direction  
17 to the vertical (Fig. 2a). Such vertical  $\beta$ -strands are highly unusual, but have also been observed in the  
18 outer membrane secretin structures of T3SS and type II secretion systems (T2SS)<sup>24,26</sup>. Despite the  
19 strong similarities, there are significant differences between FliF and SpoIIIAG, most notably in the  
20 angle of the RBM domain to the  $\beta$ -collar (Fig. 2a, Extended Data Fig. 13).

21

22 The RBM2 domain is most closely related at both sequence and structural levels to the RBM2 domain  
23 of the SctJ family from the virulence T3SS injectisomes and again this homology extends to the ring  
24 structures formed (Fig. 2b). The inner-membrane proximal portion of an injectisome basal body is  
25 formed by two different proteins, SctD and SctJ. The inner SctJ ring has been shown to house the  
26 export gate structure of the secretion system in its central cavity<sup>27,28</sup> and forms a 24-fold symmetric  
27 ring from RBM1 and RBM2 domains<sup>24</sup>. The interaction interface between neighbouring domains in  
28 the SctJ RBM2 ring is closely related to the FliF RBM2<sub>inner</sub> packing interaction (Extended Data Fig. 14),  
29 although the copy number difference does lead to a small difference in the size of the cavity.

30

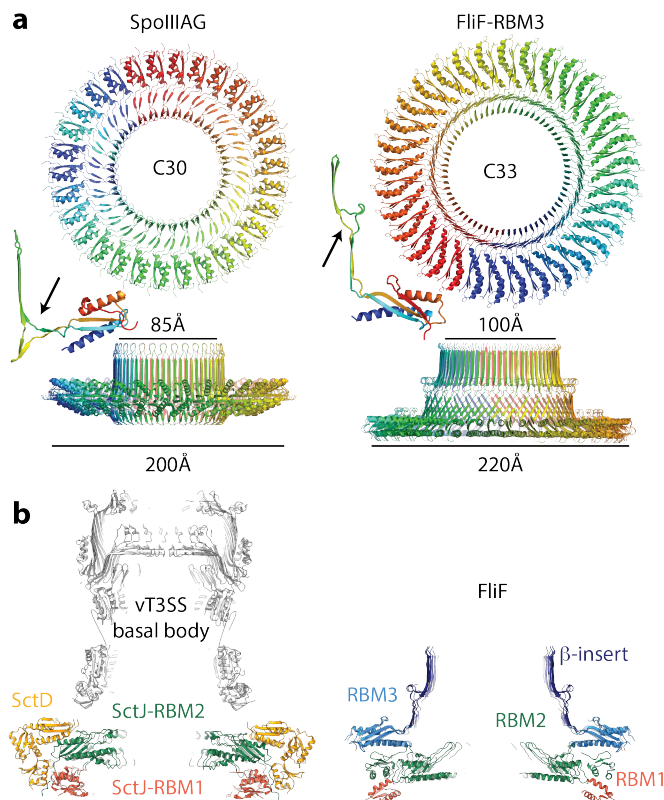

1

## 2 **Figure 2: Comparison to structurally or functionally homologous assemblies**

3 **a**, The closest structural homologue to the RBM3 portion of the FliF ring is the 30-mer fungal protein  
 4 SpoIIAG (PDB-5wc3). A view from the outer-membrane side is shown above and from the side below,  
 5 with a cartoon representation of a single, extracted, monomer also shown. A small beta-insertion  
 6 structure is indicated (arrow on monomer structures). **b**, The virulence T3SS basal body is constructed  
 7 from two protein chains in the MS-ring equivalent region, which both form 24-mer rings consisting of  
 8 multiple RBM domains. Central sections of the Salmonella SPI-1 injectisome basal body (PDB-5tcr, LH  
 9 panel) and the FliF ring (RH panel) show the striking similarity in overall shape despite fundamental  
 10 differences in the chains and domain types used. They also show the 21-fold RBM2<sub>inner</sub> domains are  
 11 very similarly arranged to the PrgK/SctJ-RBM2 24-fold ring, whilst the FliF-RBM1 and PrgK/SctJ-RBM1  
 12 domains are very differently arranged with respect to these.

13

## 14 **FliF exists in multiple stoichiometries**

15 More detailed analyses of 3D classifications of the FliF particles imposing C3 symmetry revealed a  
 16 subset of particles in which the C33 features were subtly broken. Further classification of these  
 17 particles in C1 only allowing local angular sampling revealed that they corresponded to a C34  
 18 symmetric MS-ring. Refinement of this volume with C34 symmetry imposed led to a 2.8 Å structure of  
 19 the RBM3/β-collar region of this form of the MS-ring (Fig. 3a). Initial attempts to reconstruct the  
 20 RBM2<sub>inner</sub> region of these particles with C21 symmetry were unsuccessful and so the C34  
 21 reconstruction was used as a reference in a C1 reconstruction that revealed 22-fold symmetry. Masked  
 22 refinement of the RBM2<sub>inner</sub> region with C22 symmetry imposed led to a 3.1 Å structure of this portion,



1 while refinement of the whole volume with the common C2 symmetry led to a 3.3 Å reconstruction  
2 (Fig. 3a and Extended Data Fig. 15). Surrounding the 22-fold symmetric RBM2<sub>inner</sub> ring we observed  
3 ten densities that correspond to the RBM2<sub>outer</sub>/RBM1 domain pairs observed in the 33mer structure,  
4 but again no density was observed for the final two copies of RBM2 or for twenty four copies of RBM1.

5  
6 The MS ring is therefore capable of assembling into rings of differing stoichiometries. Analysis of the  
7 interfaces buried in the FliF 34mer revealed that only very subtle changes are needed to build the  
8 alternate stoichiometry (Fig. 3b, c). The interfaces used in the 33-fold RBM3/β-collar ring are identical  
9 to those in the 34-fold RBM3, maintaining all of the bonding interactions, including the salt bridges  
10 (Fig. 3c). A similar pattern is observed for the RBM2<sub>inner</sub> rings. Although the changes are subtle, when  
11 propagated around the number of copies in the ring, they do make a difference to the diameter of  
12 each ring, with a 2.3 Å (2 %) increase seen in the RBM3/β-collar ring and a 6.6 Å (9 %) increase observed  
13 for the RBM2<sub>inner</sub> ring. The most significant difference between the two structures exists in the  
14 RBM2<sub>outer</sub>/RBM1 domain pairs, where an extra copy is observed. However, the mode of packing of the  
15 RBM2<sub>outer</sub>/RBM1 against the RBM2<sub>inner</sub> ring and the basic 2:1 (RBM2<sub>inner</sub>:RBM2<sub>outer</sub>) building block is  
16 conserved. The larger rings permit five copies of the trimer building block to assemble before the  
17 pattern is broken by the minority 1:1 (RBM2<sub>inner</sub>:RBM3only) block. It is worth noting that the  
18 symmetries of the two main rings always leave twelve copies of the monomer which don't contribute  
19 to RBM2<sub>inner</sub> and twenty four copies of RBM1 for which we see no density, although the significance  
20 of these observations is currently unclear.

21  
22 Once we had observed two different assemblies in our sample, we attempted to assess whether other  
23 symmetries were also present at lower levels. To achieve this we performed supervised 3D  
24 classifications in C1 using reference models generated to reflect RBM3 symmetries from C32 to C36  
25 (Extended Data Fig. 16). This analysis confirmed that the majority of the particles partitioned into the  
26 C33 and C34 classes (40% and 23% respectively), with 7% and 9% ending up in the C32 and C35 classes  
27 respectively. The remaining 20% went into the C36 class, but reconstructions of these particles were  
28 very low resolution and clearly artefactual.

29

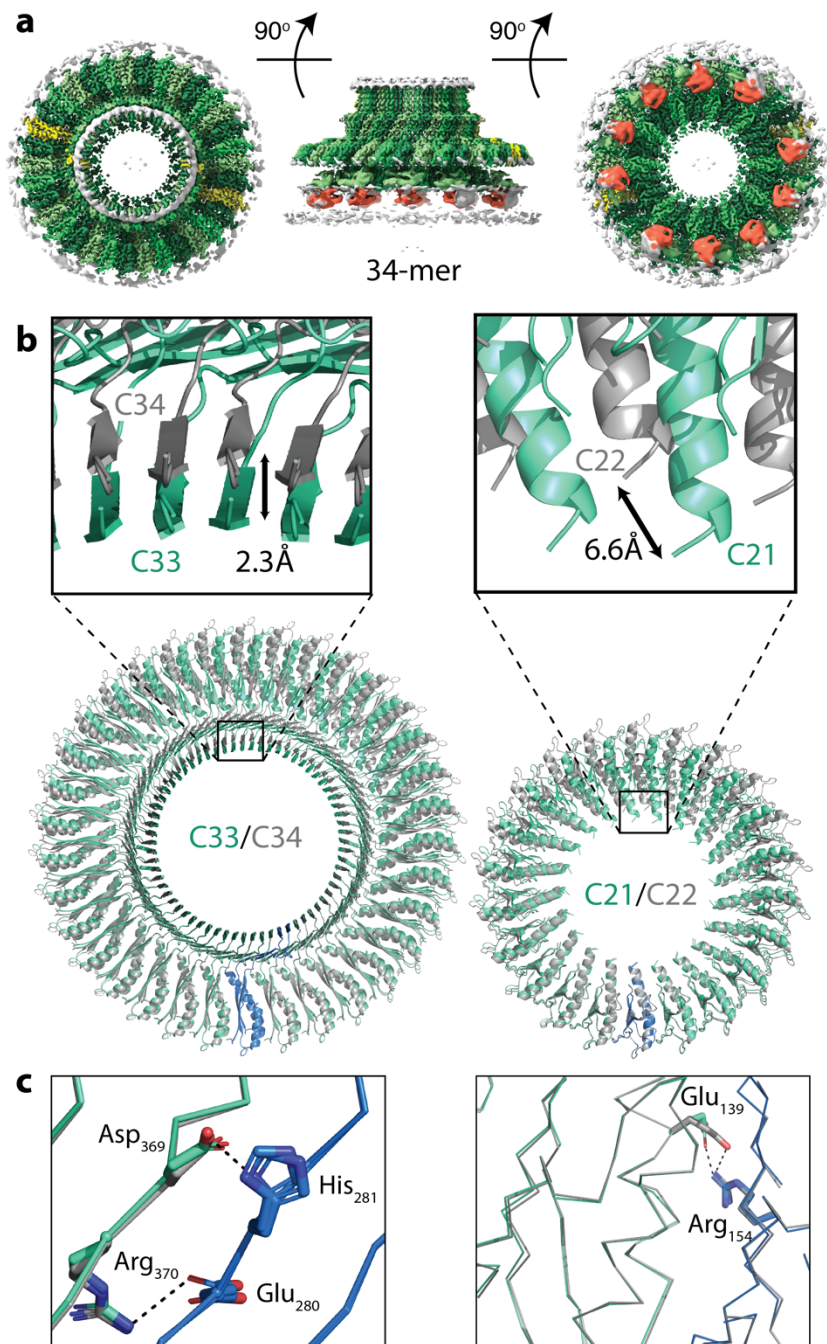

1

2 **Figure 3: The flagellar MS ring is structurally heterogenous**

3 **a**, Composite 3D cryo-EM reconstruction from a 34-fold stoichiometric subset of particles. C34  
4 symmetry is applied within the RBM3 region, C22 within the RBM2<sub>inner</sub> region and C2 symmetry applied  
5 elsewhere. The colour scheme mimics that of Figure 1c. **b**, Comparison of the C33/C34 and C21/C22  
6 regions by overlaying the complete rings using a single chain reveals the subtle differences in the sizes  
7 of the respective ring-like assemblies built. **c**, Despite assembling to form rings of different  
8 symmetries, the specific interactions from which they are built are entirely conserved, including salt  
9 bridges, in both the C33 (cyan and blue)/C34 (grey) rings (left hand panel) and the C21 (cyan and  
10 blue)/C22 (grey)rings (right hand panel).

11

12

## 1 **The MS-ring as structural adaptor**

2 The structural heterogeneity observed in this study may seem surprising for a core component of such  
3 a fundamental cellular structure, but agrees with earlier demonstrations of stoichiometric  
4 heterogeneity for the *S. Typhimurium* C-ring<sup>20-22</sup>. The C-ring is a large cytoplasmic structure that  
5 assembles on to the MS-ring via a mechanism in which the N-terminal domain of the first C-ring  
6 protein, FliG, folds around two helices at the C-terminus of FliF<sup>11,12</sup>. The other domains of FliG then  
7 recruit the other C-ring components, FliM and FliN<sup>29-32</sup>, as well as providing the interaction surface for  
8 the stator complexes that generate torque<sup>33,34</sup>. The MS-ring/C-ring junction is therefore critical for  
9 flagellar function. The large diameter (~ 450 Å in *S. Typhimurium*) and strong periodicity led to robust  
10 estimates of C-ring stoichiometry in both fully assembled flagella and in reconstituted MS-ring/C-ring  
11 structures. These studies revealed clear stoichiometric heterogeneity, with subunit numbers ranging  
12 between 32 and 36 copies<sup>20-22</sup>. The apparent mismatch between this and the originally proposed  
13 25/26-fold symmetry of the MS-ring were confusing, especially in light of the co-folding of MS-ring  
14 and C-ring structures, and had led to models whereby symmetry mismatch at some point between  
15 the two rings was important for function.

16  
17 Our structures of FliF demonstrate that the stoichiometry of the MS-ring and the C-ring are likely  
18 matched, suggesting that the entire C-ring stoichiometry is nucleated by the stoichiometry of the MS-  
19 ring. Fitting of FliF into the only available structure of a purified flagellum with an intact C-ring<sup>20</sup>  
20 demonstrates the perfect fit of the dimensions of the object within the MS-ring portion of the volume,  
21 despite this region of the volume being averaged with 25-fold symmetry (Fig. 4a). Although we do not  
22 observe the C-terminal residues of FliF in our structure, the positioning of the RBM3 domains on the  
23 outside of the ring mean they are correctly placed to reach down to the FliG ring underneath the  
24 membrane. This observation was confirmed by placing the FliF structure into a subtomogram average  
25 of *in situ* flagella from *Plesiomonas shigelloides* (Fig. 4b)<sup>35</sup>. Interestingly this placement also provides  
26 further insights into other roles the symmetric complexity of the MS-ring may play in acting as a single  
27 chain structural adaptor molecule at the centre of the system (Fig. 4c). The RBM3 domains of the  
28 structure, and hence the cytoplasmic C-termini, have the 33/34-fold symmetry required to assemble  
29 the C-ring. The RBM2<sub>inner</sub> domains, on the other hand, form the 21/22-fold symmetric ring that is seen  
30 to house the export gate in the homologous injectisome structures<sup>24,27,36</sup>. The highly conserved  
31 dimensions of the export gate<sup>37</sup> compared to the large diversity in C-ring size between bacterial  
32 species drives the requirement for symmetry mismatch between the different domains of FliF. The  
33 subtle differences in size between the central pore of the RBM2<sub>inner</sub> 21/22mers and the equivalent  
34 24mer SctJ injectisome ring suggests there is some flexibility in the details of how the export gate is

1 accommodated, perhaps related to the differences within the inner membrane region located below  
 2 this ring seen when comparing cryo-ET of flagella and injectisomes<sup>38</sup>. In both systems a nonameric  
 3 protein complex, termed the FlhA ring in flagella, forms a cytoplasmic ring directly below the basal  
 4 body, with its transmembrane domains presumed to occupy the membrane underneath the RBM2  
 5 ring<sup>36,39,40</sup>. It is noteworthy that a mutation in the  $\beta$ -sheet of the RBM2 domain of FliF (deletion of  
 6 residues 174 and 175) can be suppressed by secondary mutations in the TM domains of FlhA<sup>41</sup>,  
 7 suggesting some ability for changes in the stability of one ring to be compensated by changes in the  
 8 other. At the other side of the FliF assembly, mutations within the disordered loop at the top of the  $\beta$ -  
 9 collar (Asn318) weaken interactions with the flagellum, and revertant mutations map to components  
 10 of the proximal rod that forms the flagellar drive-shaft<sup>42</sup>.  
 11

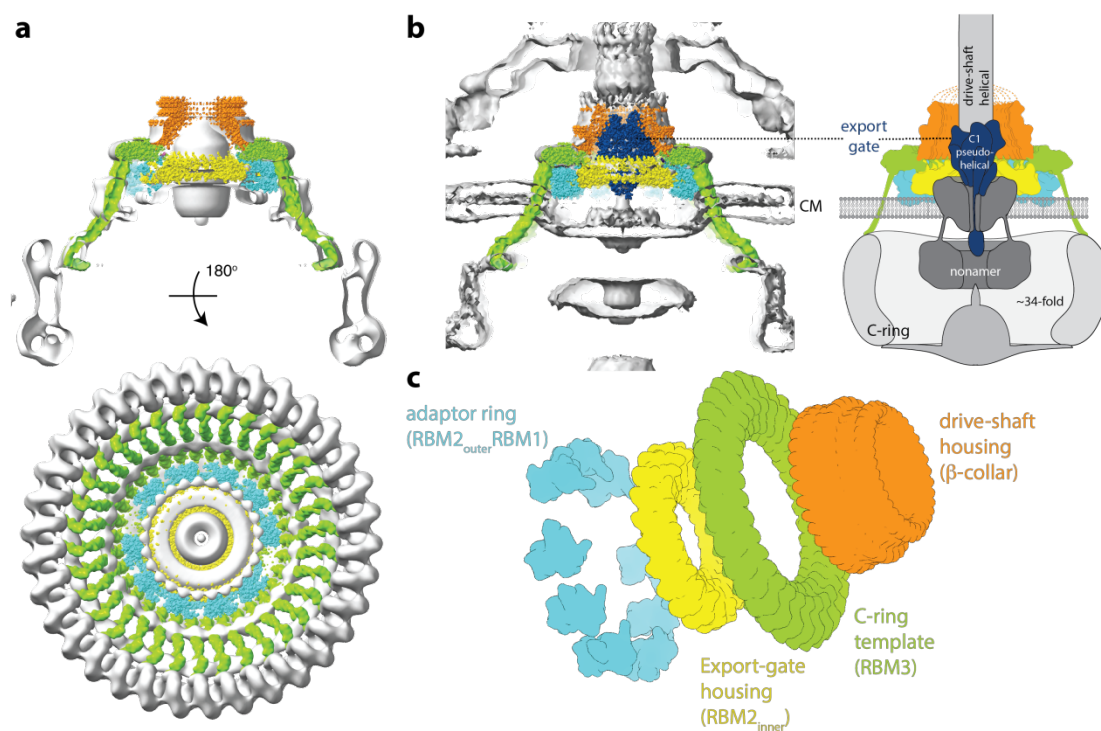

12

13 **Figure 4: The MS-ring as a structural adapter**

14 **a**, A model for the 34-mer MS-ring, coloured to highlight the different structural regions, is placed in  
 15 the single particle reconstruction of the *S. Typhimurium* flagellar basal body (grey) (EMD-1887),  
 16 showing the good match in overall shape and links to the 34-fold symmetric C-ring. The 34-mer FliF  
 17 was built in the map shown in Figure 3a and extended to the C-terminus using a continuous helix of  
 18 the correct length, ending in a homology model based on the crystal structure of residues 523-559 of  
 19 *Helicobacter pylori* FliF (PDB: 5wuj). **b**, The FliF model (coloured as in (a)) is shown placed in a *P.*  
 20 *shigelloides* tomographic volume (EMD-10057) and a model for the export gate complex (blue) (PDB-  
 21 6r69) is then docked within FliF. The panel on the right is an update of the cartoon from Figure 1a,  
 22 using this colour scheme. **c**, Exploded diagram of FliF coloured to emphasise the roles the different  
 23 symmetries play in adapting between components within the flagellar assembly.

24 **Conclusion**

1 This study has provided, for the first time, a near-atomic resolution view of the MS-ring of the bacterial  
2 flagellar rotor. The structures reveal unexpected symmetries and an unprecedented level of structural  
3 heterogeneity for a homo-oligomeric assembly. The symmetry mismatches within the structure  
4 demonstrate how the MS-ring is able to bridge multiple different structural and functional units within  
5 the flagellar basal body utilising a single protein chain (Fig. 4c). The explicit linking of the MS-ring  
6 stoichiometry to that of the C-ring introduces new questions of how rotors of different sizes in  
7 different species of bacteria can be reconciled with this model, especially given the constraints that  
8 the need to house the T3SS in the centre of the structure places on the system. Will FliF provide yet  
9 more surprises or will other adaptor proteins play a role?

10

### 11 **Acknowledgements**

12 We thank E. Johnson and A. Costin of the Central Oxford Structural Microscopy and Imaging Centre  
13 for assistance with data collection. H. Elmlund (Monash) is thanked for access to SIMPLE code ahead  
14 of release. We thank Morgan Beeby (Imperial College) for access prior to publication, to the *P.*  
15 *shigelloides* tomographic volume. The Central Oxford Structural Microscopy and Imaging Centre is  
16 supported by the Wellcome Trust (201536), The EPA Cephalosporin Trust, The Wolfson Foundation  
17 and a Royal Society/Wolfson Foundation Laboratory Refurbishment Grant (WL160052). Work in SML's  
18 lab is supported by Wellcome Trust Investigator (100298) and Collaborative awards (209194) and an  
19 MRC Programme Grant (MR/M011984/1). L.K. is a Wellcome Trust PhD student (1009136).

20

### 21 **Materials & Methods**

22 Chemicals were from Sigma-Aldrich unless otherwise specified. Detergents n-dodecyl-maltoside  
23 (DDM), Lauryl Maltose Neopentyl Glycol (LMNG) and amphipol A8-35 were from Anatrace.

24

### 25 **Protein expression**

26 The FliF expression plasmid was designed based on the pKOT105 plasmid from Ueno *et al*<sup>13</sup>. Briefly,  
27 the *fliF* gene from *Salmonella enterica* serovar Typhimurium was amplified using Q5 polymerase (NEB)  
28 and inserted into the BamHI site of pET-3b (Merck) using NEBuilder HiFi Master Mix (NEB). FliF was  
29 expressed in *Escherichia coli* BL21 (DE3) pLysS. 20 ml of overnight culture grown at 37 °C was used to  
30 inoculate 2 L of LB media, grown at 37 °C until OD<sub>600</sub> reached 0.5 and induced with 0.5 mM IPTG at 30  
31 °C for 4 hours. Cells were harvested by centrifugation at 5000 x g for 10 minutes and frozen at -20 °C  
32 until use.

33

### 34 **Protein purification**



1 Frozen cell pellet was resuspended in 40 ml of lysis buffer (50 mM Tris pH 8, 50 mM NaCl, 5 mM EDTA)  
2 and lysed by 3 passes through an Emulsiflex C5 homogeniser (Avestin) at 10,000 psi. After  
3 centrifugation at 20,000 x g for 20 min to remove cell debris, cell membranes were collected by  
4 ultracentrifugation at 186,000 x g for 1 hour. Collected membranes were dissolved in 40 ml of alkaline  
5 buffer (50 mM CAPS pH 11, 5 mM EDTA, 50 mM NaCl, 1 % (w/v) DDM) at 4 °C for 1 hour. Undissolved  
6 material was removed by centrifugation at 20,000 x g for 20 minutes. Solubilised FliF was then pelleted  
7 by ultracentrifugation at 143,000 x g for 1 hour. Pelleted FliF was resuspended in 2 ml of resuspension  
8 buffer (25 mM HEPES pH 8, 50 mM NaCl, 0.1 % (w/v) DDM). FliF ring assemblies were then separated  
9 from FliF monomers by loading the resuspended FliF on a 15-40 % (v/v) sucrose gradient prepared  
10 using gradient buffer (10 mM HEPES pH 8, 5 mM EDTA, 0.02 % (w/v) DDM). The gradient was then  
11 centrifuged at 25,000 rpm for 15.5 hours using SW55Ti rotor. Gradient fixation (GraFix<sup>43</sup>) was used to  
12 improve stability of FliF ring assembly by addition of a 0-0.2 % (v/v) glutaraldehyde gradient to the  
13 sucrose gradient. Selected fractions of the sucrose gradient containing FliF ring assemblies was  
14 dialysed against dialysis buffer (25 mM Tris pH 8, 50 mM NaCl, 0.02 % (w/v) DDM) overnight to remove  
15 sucrose and concentrated to the appropriate concentration using a 300 kDa MWCO concentrator. For  
16 FliF preparations using Triton-X100, the same concentration of Triton-X100 was used in place of DDM.

17

18 Amphipol trapping of GraFix crosslinked FliF purified in DDM was performed by addition of amphipol  
19 A8-35 to 0.8 mg/ml FliF at 1:3 (w/w) ratio. Excess detergent was removed by the addition of BioBeads  
20 (BioRad) at 20-fold excess of detergent mass. Excess amphipol was removed by buffer exchanging into  
21 detergent-less dialysis buffer using a 100 kDa MWCO concentrator.

22

### 23 **Cryo-EM sample preparation and imaging**

24 FliF samples were added to 300 mesh R1.2/1.3 Quantifoil Cu grids coated with graphene oxide  
25 substrate, blotted using Vitrobot Mark IV (FEI) and frozen with liquid ethane. The grids were imaged  
26 using a 300 keV Titan Krios microscope (FEI) with an energy filter and Gatan K2 detector (Gatan). Data  
27 were collected with a pixel size of 0.822 Å and an exposure of 1.5 e/ Å<sup>2</sup>/frame for 32 frames. For the  
28 sample in Triton X-100, 6111 movies were collected. For the sample in DDM, 9173 movies were  
29 collected. For the sample in amphipol A8-35, 11538 movies were collected.

30

### 31 **Cryo-EM data processing**

32 Micrographs were initially processed in real time using the SIMPLE pipeline<sup>44</sup>, using SIMPLE-unblur  
33 for motion correction, SIMPLE-CTFFIND for CTF estimation and SIMPLE-picker for particle picking.  
34 Following initial 2D classification in SIMPLE to remove poor quality particles, all subsequent processing



1 was carried out in RELION-3.0<sup>45</sup>. Particles were re-extracted using a 432 x 432 pixel box from  
2 micrographs that had been re-processed using the MotionCor2<sup>46</sup> implementation in RELION-3.0, with  
3 CTF estimation by CTFFIND4<sup>47</sup>.

4  
5 Initial processing of the Triton-X100 extracted particles produced 2D classes with close to top down  
6 views that allowed preliminary counting of the subunits around the perimeter of the object, although  
7 the lack of purely top down views prevented unambiguous assignment. 27435 particles were selected  
8 after classification and used to generate *ab initio* initial models with C33 and C34 symmetry. 3D  
9 classification was carried out with C33 and C34 symmetries applied and the C33 job produced a class  
10 containing 15634 particles that refined to 3.8 Å using gold standard refinement. Reclassification of the  
11 original particles produced a 19520 particle set that led to a 3.1 Å map following Bayesian polishing<sup>48</sup>  
12 and per-particle CTF refinement. This allowed *de novo* model building of the RBM3/ $\beta$ -collar domains  
13 (residues 231-438) but all other regions of the map remained untraceable. Attempts at reconstructing  
14 with lower symmetry were hindered by the low particle number.

15  
16 A larger, DDM-extracted, dataset was collected that contained 188007 particles after 2D classification.  
17 3D classification applying C33 symmetry resulted in one good class with 106745 particles which were  
18 then used in a C1 symmetry refinement. This produced density in the ring below the C33 ring with a  
19 clear periodicity that could be counted as C21. Refinement of this particle set with the common  
20 symmetry of C3 applied produced a 3.3 Å map, following Bayesian polishing and CTF refinement, that  
21 revealed an RBM fold in the 21-fold symmetric ring. However, the quality of this portion of the map  
22 was not sufficiently detailed to allow *de novo* model building. As the proportion of particles that  
23 produced a sub-3.5 Å map were similar between the two different detergent extractions, and the  
24 maps produced were indistinguishable, we created a combined dataset containing the post-2D  
25 classification particles from the Triton-X100 and DDM extractions and a small dataset from a DDM  
26 extracted sample that had been exchanged into amphipol A8-35. This dataset, containing 273493  
27 particles was subjected to 3D classification applying C3 symmetry, using the DDM-only model low pass  
28 filtered as a reference. After two rounds of 3D classification, two good classes were produced,  
29 containing 126285 and 59163 particles. The first of these classes refined to a pure C33 object in the  
30 RBM3 region, but the second class produced a map with ~11.3 subunits per “asymmetric unit” in the  
31 C3 symmetry. We therefore re-refined this class applying C34 symmetry, which produced a 3.3 Å gold  
32 standard map. Refinement of the “C34” particles in C1 produced periodicity in the ring below the  
33 RBM3 ring consistent with C22 symmetry.

34

1 Due to the increased complexity of the sample, we collected a large A8-35 exchanged dataset and  
2 created a composite Triton-X100/DDM/A8-35 dataset containing 449142 particles after 2D  
3 classification. These particles were then subjected to a supervised 3D classification in C1, using C33  
4 and C34 maps as references, producing classes with 308536 and 140606 particles respectively. The  
5 C33 class was subjected to a further round of classification, producing a good class with 175233  
6 particles that was refined in C3 to an overall resolution of 2.9 Å following Bayesian polishing and CTF  
7 refinement. Further focused classification and refinement of the C33 particles with a mask around the  
8 RBM3/ $\beta$ -collar region, and with C33 symmetry applied, produced a 2.6 Å map from 77849 particles.  
9 Further focused classification and refinement of the C33 particles with a mask around the RBM2<sub>inner</sub>  
10 region, and with C21 symmetry applied, produced a 2.9 Å map from 84797 particles. Attempts to  
11 improve the resolution of the RBM2<sub>outer</sub>/RBM1 region through particle subtraction, multi-body  
12 refinement and local averaging were unsuccessful. Initial refinements of the entire object produced  
13 maps with nine strong copies of the RBM2<sub>outer</sub>/RBM1 pair and weaker density in the gaps between  
14 copies 3 and 4, 6 and 7 and 9 and 1. This weaker density was consistent with being a superposition of  
15 two copies of the RBM2<sub>outer</sub>/RBM1 density. However, the spacing of these domains was such that  
16 these gaps could not accommodate a full RBM2<sub>outer</sub>/RBM1 pair without structural rearrangement, and  
17 we reasoned that the density observed could be produced by rotational misalignment of a subset of  
18 the particles producing “ghost” density from the strong domains. In order to test this, we masked  
19 around the nine strong domain pairs and used this mask in a focused refinement, with the logic that  
20 if extra copies were genuinely ordered they would appear in the final, unmasked, map. This was not  
21 found to be the case. The C34 class was refined with C2 symmetry applied and produced a 3.3 Å map  
22 after Bayesian polishing and CTF refinement. Further focused refinement of the C34 particles with a  
23 mask around the RBM3/ $\beta$ -collar region, and with C34 symmetry applied, produced a 2.8 Å map.  
24 Further focused classification and refinement of the C34 particles with a mask around the RBM2<sub>inner</sub>  
25 region, and with C22 symmetry applied, produced a 3.1 Å map from 87107 particles. Similar analysis  
26 of the RBM2<sub>outer</sub>/RBM1 region was applied as in the C33 refinements, with similar results, but in this  
27 case ten copies of the domain pair could be placed. All processing statistics are summarised in  
28 Extended Data Tables 1 and 2.

29

### 30 **Model building and refinement**

31 A monomer model for the RBM3 and the  $\beta$ -collar (residues 231-438) was built manually in Coot<sup>49</sup>  
32 using the 2.6 Å map with C33 symmetry applied, assembled into a 33-fold model, and refined using  
33 phenix.real\_space\_refine<sup>50</sup>. A monomer model for RBM2 (residues 125-222) was built manually in  
34 Coot using the 2.9 Å map with C21 symmetry applied, assembled into a 21mer of the RBM2<sub>inner</sub> region

1 and refined using phenix.real\_space\_refine. The whole 33mer was assembled from these two  
2 structures in the 2.9 Å map with C3 symmetry applied. The two main rings were joined by manually  
3 building the linkers in Coot. Nine copies of the high resolution RBM2 domain were placed manually in  
4 the RBM<sub>outer</sub> domain densities of a 4 Å lowpass filtered version of the C3 map, and rigid body refined.  
5 Nine copies of a RaptorX generated homology model of RBM1 (residues 50-106) were manually  
6 positioned in the density underneath the RBM<sub>outer</sub> domains and rigid body refined. The completed  
7 33mer was refined with phenix.real\_space\_refine, using the higher resolution C33 and C21 structures  
8 as reference models. The RBM3/β-collar monomer built in the C33 map was used to assemble a 34-  
9 fold model in the 2.8 Å map with C34 symmetry applied, and was refined using  
10 phenix.real\_space\_refine. A 22-fold RBM2<sub>inner</sub> model was assembled in the 3.1 Å map with C22  
11 symmetry applied, using the RBM2 monomer built in the C21 map, and was refined using  
12 phenix.real\_space\_refine. The whole 34mer was assembled from these two structures in the 3.3 Å  
13 map with C2 symmetry applied. The two main rings were joined by manually building the linkers in  
14 Coot. Ten copies of the RBM<sub>outer</sub>/RBM1 domain pairs from the 33mer model were placed manually in  
15 the appropriate densities of a 4 Å lowpass filtered version of the C2 map, and were rigid body refined.  
16 The completed 34mer was refined with phenix.real\_space\_refine, using the higher resolution C34 and  
17 C22 structures as reference models. All models were validated using Molprobrity<sup>51</sup>. All refinement and  
18 validation statistics are summarised in Extended Data Tables 1 and 2. Conservation analysis was  
19 carried out using the ConSurf server<sup>52</sup>. Figures were prepared using Pymol (The PyMOL Molecular  
20 Graphics System, Version 2.0 Schrödinger, LLC) and ChimeraX<sup>53</sup>.

21

## 22 Author Contributions

23 SJ & SML designed the project, interpreted the data and wrote the first draft of the paper. SJ analysed  
24 the data. YHF cloned, expressed and purified protein samples, and made and optimised EM grids. JCD  
25 made and screened grids. JCD & SML collected the EM data. EF expressed and purified samples and  
26 made EM grids. LK made constructs and performed preliminary purification experiments. All authors  
27 commented on drafts of the manuscript.

28

## 29 References

- 30 1 Leeuwenhoek, A. Observation, communicated to the publisher by Mr Anthony van  
31 Leewenhoek, in a Dutch letter of the 9 Octob. 1676 here English'd: concerning little animals  
32 by him observed in rain-well-sea and snow water; as also in water wherein pepper had lain  
33 infused. *Phil. Trans.* **12**, 821-831, doi:doi:10.1098/rstl.1677.0003 (1677).
- 34 2 Berg, H. C. The rotary motor of bacterial flagella. *Annu Rev Biochem* **72**, 19-54,  
35 doi:10.1146/annurev.biochem.72.121801.161737 (2003).

- 1 3 Erhardt, M., Namba, K. & Hughes, K. T. Bacterial nanomachines: the flagellum and type III  
2 injectisome. *Cold Spring Harb Perspect Biol* **2**, a000299, doi:10.1101/cshperspect.a000299  
3 (2010).
- 4 4 Macnab, R. M. How bacteria assemble flagella. *Annu Rev Microbiol* **57**, 77-100,  
5 doi:10.1146/annurev.micro.57.030502.090832 (2003).
- 6 5 Chen, S. *et al.* Structural diversity of bacterial flagellar motors. *EMBO J* **30**, 2972-2981,  
7 doi:10.1038/emboj.2011.186 (2011).
- 8 6 Magariyama, Y. *et al.* Very fast flagellar rotation. *Nature* **371**, 752, doi:10.1038/371752b0  
9 (1994).
- 10 7 Sowa, Y. & Berry, R. M. Bacterial flagellar motor. *Q Rev Biophys* **41**, 103-132,  
11 doi:10.1017/S0033583508004691 (2008).
- 12 8 Berg, H. C. The flagellar motor adapts, optimizing bacterial behavior. *Protein Sci* **26**, 1249-  
13 1251, doi:10.1002/pro.3055 (2017).
- 14 9 Francis, N. R., Sosinsky, G. E., Thomas, D. & DeRosier, D. J. Isolation, characterization and  
15 structure of bacterial flagellar motors containing the switch complex. *J Mol Biol* **235**, 1261-  
16 1270, doi:10.1006/jmbi.1994.1079 (1994).
- 17 10 Tang, H., Braun, T. F. & Blair, D. F. Motility protein complexes in the bacterial flagellar motor.  
18 *J Mol Biol* **261**, 209-221, doi:10.1006/jmbi.1996.0453 (1996).
- 19 11 Lynch, M. J. *et al.* Co-Folding of a FliF-FliG Split Domain Forms the Basis of the MS:C Ring  
20 Interface within the Bacterial Flagellar Motor. *Structure* **25**, 317-328,  
21 doi:10.1016/j.str.2016.12.006 (2017).
- 22 12 Xue, C. *et al.* Crystal structure of the FliF-FliG complex from *Helicobacter pylori* yields insight  
23 into the assembly of the motor MS-C ring in the bacterial flagellum. *J Biol Chem* **293**, 2066-  
24 2078, doi:10.1074/jbc.M117.797936 (2018).
- 25 13 Ueno, T., Oosawa, K. & Aizawa, S. M ring, S ring and proximal rod of the flagellar basal body  
26 of *Salmonella typhimurium* are composed of subunits of a single protein, FliF. *J Mol Biol* **227**,  
27 672-677, doi:10.1016/0022-2836(92)90216-7 (1992).
- 28 14 Ueno, T., Oosawa, K. & Aizawa, S. Domain structures of the MS ring component protein (FliF)  
29 of the flagellar basal body of *Salmonella typhimurium*. *J Mol Biol* **236**, 546-555,  
30 doi:10.1006/jmbi.1994.1164 (1994).
- 31 15 Jones, C. J. & Macnab, R. M. Flagellar assembly in *Salmonella typhimurium*: analysis with  
32 temperature-sensitive mutants. *J Bacteriol* **172**, 1327-1339, doi:10.1128/jb.172.3.1327-  
33 1339.1990 (1990).
- 34 16 Diepold, A. & Armitage, J. P. Type III secretion systems: the bacterial flagellum and the  
35 injectisome. *Philos Trans R Soc Lond B Biol Sci* **370**, doi:10.1098/rstb.2015.0020 (2015).
- 36 17 Bergeron, J. R. Structural modeling of the flagellum MS ring protein FliF reveals similarities to  
37 the type III secretion system and sporulation complex. *PeerJ* **4**, e1718, doi:10.7717/peerj.1718  
38 (2016).
- 39 18 Jones, C. J., Macnab, R. M., Okino, H. & Aizawa, S. Stoichiometric analysis of the flagellar hook-  
40 (basal-body) complex of *Salmonella typhimurium*. *J Mol Biol* **212**, 377-387, doi:10.1016/0022-  
41 2836(90)90132-6 (1990).
- 42 19 Suzuki, H., Yonekura, K. & Namba, K. Structure of the rotor of the bacterial flagellar motor  
43 revealed by electron cryomicroscopy and single-particle image analysis. *J Mol Biol* **337**, 105-  
44 113, doi:10.1016/j.jmb.2004.01.034 (2004).
- 45 20 Thomas, D. R., Francis, N. R., Xu, C. & DeRosier, D. J. The three-dimensional structure of the  
46 flagellar rotor from a clockwise-locked mutant of *Salmonella enterica* serovar Typhimurium. *J*  
47 *Bacteriol* **188**, 7039-7048, doi:10.1128/JB.00552-06 (2006).
- 48 21 Thomas, D. R., Morgan, D. G. & DeRosier, D. J. Rotational symmetry of the C ring and a  
49 mechanism for the flagellar rotary motor. *Proc Natl Acad Sci U S A* **96**, 10134-10139,  
50 doi:10.1073/pnas.96.18.10134 (1999).

- 1 22 Young, H. S., Dang, H., Lai, Y., DeRosier, D. J. & Khan, S. Variable symmetry in Salmonella  
2 typhimurium flagellar motors. *Biophys J* **84**, 571-577, doi:10.1016/S0006-3495(03)74877-2  
3 (2003).
- 4 23 Kim, E. A. *et al.* Architecture of the Flagellar Switch Complex of Escherichia coli:  
5 Conformational Plasticity of FliG and Implications for Adaptive Remodeling. *J Mol Biol* **429**,  
6 1305-1320, doi:10.1016/j.jmb.2017.02.014 (2017).
- 7 24 Worrall, L. J. *et al.* Near-atomic-resolution cryo-EM analysis of the Salmonella T3S injectisome  
8 basal body. *Nature* **540**, 597-601, doi:10.1038/nature20576 (2016).
- 9 25 Zeytuni, N. *et al.* Near-atomic resolution cryoelectron microscopy structure of the 30-fold  
10 homooligomeric SpoIIAG channel essential to spore formation in Bacillus subtilis. *Proc Natl*  
11 *Acad Sci U S A* **114**, E7073-E7081, doi:10.1073/pnas.1704310114 (2017).
- 12 26 Yan, Z., Yin, M., Xu, D., Zhu, Y. & Li, X. Structural insights into the secretin translocation channel  
13 in the type II secretion system. *Nat Struct Mol Biol* **24**, 177-183, doi:10.1038/nsmb.3350  
14 (2017).
- 15 27 Hu, J. *et al.* Cryo-EM analysis of the T3S injectisome reveals the structure of the needle and  
16 open secretin. *Nat Commun* **9**, 3840, doi:10.1038/s41467-018-06298-8 (2018).
- 17 28 Kuhlen, L. *et al.* Structure of the core of the type III secretion system export apparatus. *Nat*  
18 *Struct Mol Biol* **25**, 583-590, doi:10.1038/s41594-018-0086-9 (2018).
- 19 29 Lam, K. H. *et al.* Structural basis of FliG-FliM interaction in Helicobacter pylori. *Mol Microbiol*  
20 **88**, 798-812, doi:10.1111/mmi.12222 (2013).
- 21 30 Paul, K., Gonzalez-Bonet, G., Bilwes, A. M., Crane, B. R. & Blair, D. Architecture of the flagellar  
22 rotor. *EMBO J* **30**, 2962-2971, doi:10.1038/emboj.2011.188 (2011).
- 23 31 Sircar, R. *et al.* Assembly states of FliM and FliG within the flagellar switch complex. *J Mol Biol*  
24 **427**, 867-886, doi:10.1016/j.jmb.2014.12.009 (2015).
- 25 32 Vartanian, A. S., Paz, A., Fortgang, E. A., Abramson, J. & Dahlquist, F. W. Structure of flagellar  
26 motor proteins in complex allows for insights into motor structure and switching. *J Biol Chem*  
27 **287**, 35779-35783, doi:10.1074/jbc.C112.378380 (2012).
- 28 33 Morimoto, Y. V., Nakamura, S., Hiraoka, K. D., Namba, K. & Minamino, T. Distinct roles of  
29 highly conserved charged residues at the MotA-FliG interface in bacterial flagellar motor  
30 rotation. *J Bacteriol* **195**, 474-481, doi:10.1128/JB.01971-12 (2013).
- 31 34 Zhou, J., Lloyd, S. A. & Blair, D. F. Electrostatic interactions between rotor and stator in the  
32 bacterial flagellar motor. *Proc Natl Acad Sci U S A* **95**, 6436-6441,  
33 doi:10.1073/pnas.95.11.6436 (1998).
- 34 35 Ferreira, J. L. *et al.* gamma-proteobacteria eject their polar flagella under nutrient depletion,  
35 retaining flagellar motor relic structures. *PLoS Biol* **17**, e3000165,  
36 doi:10.1371/journal.pbio.3000165 (2019).
- 37 36 Hu, B., Lara-Tejero, M., Kong, Q., Galan, J. E. & Liu, J. In Situ Molecular Architecture of the  
38 Salmonella Type III Secretion Machine. *Cell* **168**, 1065-1074 e1010,  
39 doi:10.1016/j.cell.2017.02.022 (2017).
- 40 37 Johnson, S., Kuhlen, L., Deme, J. C., Abrusci, P. & Lea, S. M. The Structure of an Injectisome  
41 Export Gate Demonstrates Conservation of Architecture in the Core Export Gate between  
42 Flagellar and Virulence Type III Secretion Systems. *MBio* **10**, doi:10.1128/mBio.00818-19  
43 (2019).
- 44 38 Kawamoto, A. *et al.* Common and distinct structural features of Salmonella injectisome and  
45 flagellar basal body. *Sci Rep* **3**, 3369, doi:10.1038/srep03369 (2013).
- 46 39 Abrusci, P. *et al.* Architecture of the major component of the type III secretion system export  
47 apparatus. *Nat Struct Mol Biol* **20**, 99-104, doi:10.1038/nsmb.2452 (2013).
- 48 40 Terahara, N. *et al.* Insight into structural remodeling of the FlhA ring responsible for bacterial  
49 flagellar type III protein export. *Sci Adv* **4**, ea07054, doi:10.1126/sciadv.a07054 (2018).

- 1 41 Kihara, M., Minamino, T., Yamaguchi, S. & Macnab, R. M. Intergenic suppression between the  
2 flagellar MS ring protein FlIF of Salmonella and FlhA, a membrane component of its export  
3 apparatus. *J Bacteriol* **183**, 1655-1662, doi:10.1128/JB.183.5.1655-1662.2001 (2001).
- 4 42 Komatsu, H. *et al.* Genetic analysis of revertants isolated from the rod-fragile flIF mutant of  
5 Salmonella. *Biophys Physicobiol* **13**, 13-25, doi:10.2142/biophysico.13.0\_13 (2016).
- 6 43 Kastner, B. *et al.* GraFix: sample preparation for single-particle electron cryomicroscopy. *Nat*  
7 *Methods* **5**, 53-55, doi:10.1038/nmeth1139 (2008).
- 8 44 Reboul, C. F. *et al.* Rapid near-atomic resolution single-particle 3D reconstruction with SIMPLE.  
9 *J Struct Biol* **204**, 172-181, doi:10.1016/j.jsb.2018.08.005 (2018).
- 10 45 Zivanov, J. *et al.* New tools for automated high-resolution cryo-EM structure determination in  
11 RELION-3. *Elife* **7**, doi:10.7554/eLife.42166 (2018).
- 12 46 Zheng, S. Q. *et al.* MotionCor2: anisotropic correction of beam-induced motion for improved  
13 cryo-electron microscopy. *Nat Methods* **14**, 331-332, doi:10.1038/nmeth.4193 (2017).
- 14 47 Rohou, A. & Grigorieff, N. CTFFIND4: Fast and accurate defocus estimation from electron  
15 micrographs. *J Struct Biol* **192**, 216-221, doi:10.1016/j.jsb.2015.08.008 (2015).
- 16 48 Zivanov, J., Nakane, T. & Scheres, S. H. W. A Bayesian approach to beam-induced motion  
17 correction in cryo-EM single-particle analysis. *IUCrJ* **6**, 5-17, doi:10.1107/S205225251801463X  
18 (2019).
- 19 49 Brown, A. *et al.* Tools for macromolecular model building and refinement into electron cryo-  
20 microscopy reconstructions. *Acta Crystallogr D Biol Crystallogr* **71**, 136-153,  
21 doi:10.1107/S1399004714021683 (2015).
- 22 50 Afonine, P. V. *et al.* Real-space refinement in PHENIX for cryo-EM and crystallography. *Acta*  
23 *Crystallogr D Struct Biol* **74**, 531-544, doi:10.1107/S2059798318006551 (2018).
- 24 51 Williams, C. J. *et al.* MolProbity: More and better reference data for improved all-atom  
25 structure validation. *Protein Sci* **27**, 293-315, doi:10.1002/pro.3330 (2018).
- 26 52 Ashkenazy, H. *et al.* ConSurf 2016: an improved methodology to estimate and visualize  
27 evolutionary conservation in macromolecules. *Nucleic Acids Res* **44**, W344-350,  
28 doi:10.1093/nar/gkw408 (2016).
- 29 53 Goddard, T. D. *et al.* UCSF ChimeraX: Meeting modern challenges in visualization and analysis.  
30 *Protein Sci* **27**, 14-25, doi:10.1002/pro.3235 (2018).
- 31
